# Supplementary material for: Complete genome sequence and annotation of the laboratory reference strain Shigella flexneri serotype 5a M90T and genome-wide transcriptional start site determination
Source: PubMed Central journal article supplement (PMC7132871; doi:10.1186/s12864-020-6565-5), 2020-04-06

a)

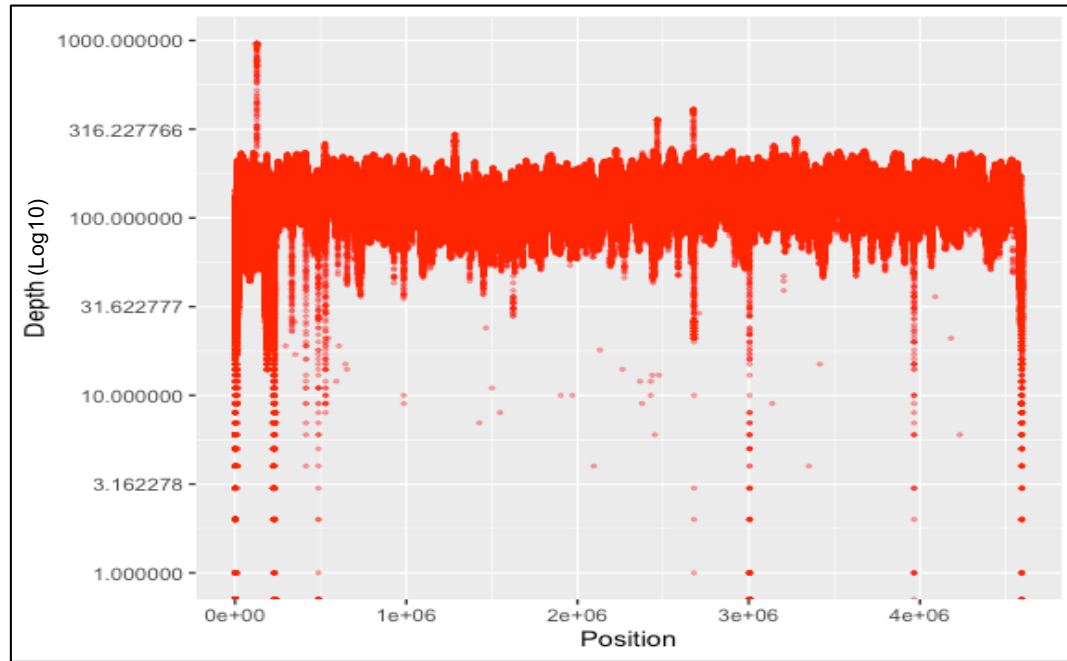

b)

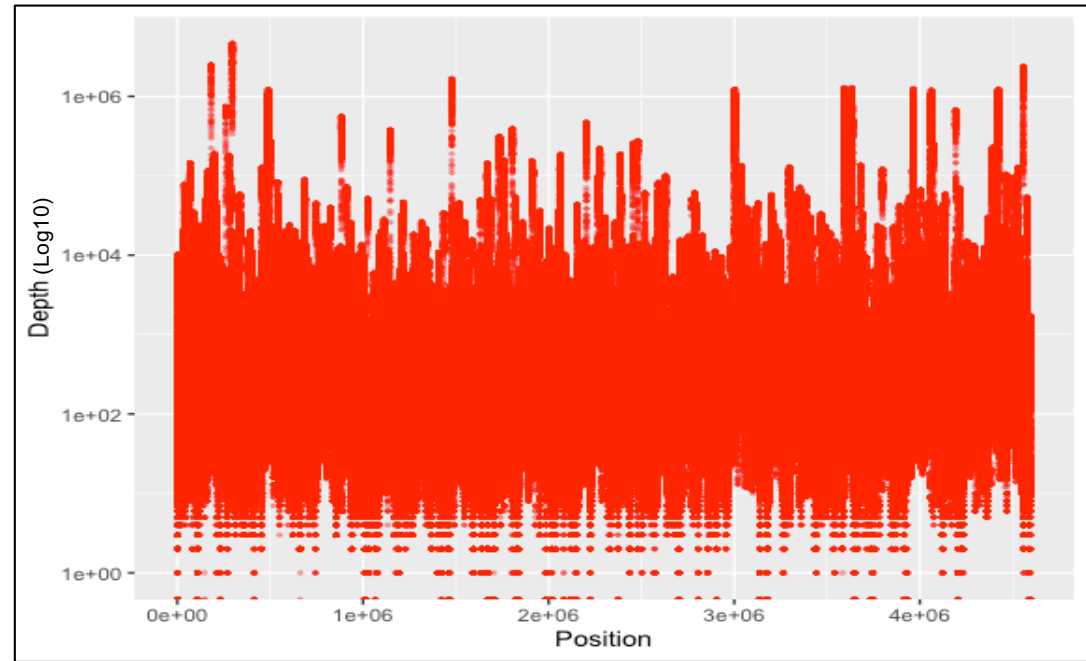

Supplement: 12864_2020_6565_MOESM1_ESM.pdf [file 12864_2020_6565_MOESM1_ESM.pdf]
