# Supplementary material for: Complete genome sequence and annotation of the laboratory reference strain Shigella flexneri serotype 5a M90T and genome-wide transcriptional start site determination
Source: PubMed Central journal article supplement (PMC7132871; doi:10.1186/s12864-020-6565-5), 2020-04-06
Supplement: 12864_2020_6565_MOESM2_ESM.pdf [file 12864_2020_6565_MOESM2_ESM.pdf]

|                           | Prokka     |        | RAST       |        | PGAP/NCBI  |        |
|---------------------------|------------|--------|------------|--------|------------|--------|
|                           | Chromosome | pWR100 | Chromosome | pWR100 | Chromosome | pWR100 |
| <b>Total length (bp)</b>  | 4596714    | 232195 | 4596714    | 232195 | 4596714    | 232195 |
| <b>No. total CDSs</b>     | 4713       | 310    | 4943       | 364    | 4629       | 320    |
| <b>No. Of rRNAs</b>       | 22         | 0      | 22         | 0      | 22         | 0      |
| <b>No. of tRNAs</b>       | 103        | 0      | 102        | 0      | 102        | 0      |
| <b>No. of pseudogenes</b> | 0          | 0      | 0          | 0      | 640        | 129    |
